# Supplementary material for: Isolation, Characterization and Pharmacological Investigations of a New Phenolic Compound along with Four Others Firstly Reported Phytochemicals from Glycosmis cyanocarpa (Blume) Spreng
Source: MDPI journal article supplement (doi:10.3390/molecules27185972), 2022-09-14
Supplement: s1 [file s1]

**Table S1. <sup>1</sup>H NMR Spectroscopic Data (400 MHz, CDCl<sub>3</sub>) for Compound 1.**

| <b>Compound 1</b>   |                                  |                                        |                               | <b>2-methoxy-4-propyl phenol</b><br>(Monguchi et al., 2011) |                      |
|---------------------|----------------------------------|----------------------------------------|-------------------------------|-------------------------------------------------------------|----------------------|
| <b>Position</b>     | <b>δ<sup>*</sup><sub>C</sub></b> | <b>δ<sub>H</sub></b>                   | <b>HMBC</b>                   | <b>δ<sub>H</sub></b>                                        | <b>δ<sub>C</sub></b> |
| 1                   | 132.32                           | ---                                    | ---                           | ---                                                         | 134.5                |
| 2                   | 111.05                           | 6.53, br s                             | 121.32 (C-6),<br>143.90 (C-4) | 6.63, 1H br s                                               | 111.0                |
| 3                   | 146.40                           | ---                                    | ---                           | ---                                                         | ---                  |
| 4                   | 143.90                           | ---                                    | ---                           | ---                                                         | ---                  |
| 5                   | 114.09                           | 6.82, 1H d<br>( <i>J</i> = 8.0 Hz)     | 132.32 (C-1),<br>146.40 (C-3) | 6.81, 1H d<br>( <i>J</i> = 8.2 Hz)                          | 114.1                |
| 6                   | 121.32                           | 6.60, 1H d<br>( <i>J</i> = 8.0 Hz)     | 143.90 (C-4)                  | 6.63-6.65<br>2H m                                           | 120.9                |
| 7                   | 46.47                            | 2.57, 2H br t<br>( <i>J</i> = 6.8, Hz) | ---                           | 2.50, 2H t<br>( <i>J</i> = 7.7 Hz)                          | ---                  |
| 8                   | 39.23                            | <b>2.55, 1H m</b>                      | 46.47 (C-7)                   | <b>1.59, 2H dd</b><br>( <i>J</i> = 7.2, 7.7 Hz)             | 37.6                 |
| 9                   | 73.30                            | 3.93, 2H m                             |                               | ---                                                         | ---                  |
| OCH <sub>3</sub> -3 | 55.79                            | 3.85, 3H s                             |                               | 3.81, 3H s                                                  | 55.7                 |
| CH <sub>3</sub> -8  | 14.14                            | <b>0.86, 3H m</b>                      | 39.23 (C-8)                   | <b>0.92, 3H t</b><br>( <i>J</i> = 7.2 Hz)                   | 13.7                 |

**Table S2. <sup>1</sup>H NMR Spectroscopic Data (400 MHz, CDCl<sub>3</sub>) for Compound 2.**

| Position            | Compound 2                  |                                          |        | 3-methyl-1 <i>H</i> -indole<br>(Abraham and Reid, 2002) |
|---------------------|-----------------------------|------------------------------------------|--------|---------------------------------------------------------|
|                     | δ <sup>*</sup> <sub>C</sub> | δ <sub>H</sub>                           | HSQC   | δ <sub>H</sub>                                          |
| 2                   | 121.96                      | 7.04, 1H d<br>( <i>J</i> = 2.0 Hz)       | 121.96 | 6.96                                                    |
| 3                   | 100.61                      | ---                                      | ---    | ---                                                     |
| 4                   | 118.73                      | 7.66, 1H d<br>( <i>J</i> = 7.8 Hz)       | 118.73 | 7.58                                                    |
| 5                   | 119.56                      | 7.13, 1H dd<br>( <i>J</i> = 7.8, 7.2 Hz) | 119.56 | 7.12                                                    |
| 6                   | 121.96                      | 7.20, 1H dd<br>( <i>J</i> = 7.8, 7.2 Hz) | 121.96 | 7.19                                                    |
| 7                   | 110.20                      | 7.36, 1H d<br>( <i>J</i> = 8.0 Hz)       | 110.20 | 7.30                                                    |
| 8                   | 139.50                      | ---                                      | ---    | ---                                                     |
| 9                   | 136.30                      | ---                                      | ---    | ---                                                     |
| NH                  | -                           | 7.99, 1Hd<br>( <i>J</i> = 2.0 Hz)        | ---    | ---                                                     |
| CH <sub>3</sub> - 3 | 13.06                       | 2.36, 3H s                               | 13.06  | 2.34                                                    |

**Table S3. <sup>1</sup>H NMR Spectroscopic Data (400 MHz, CDCl<sub>3</sub>) for Compound 3.**

| Position                                                                | Compound 3 3                       | Tri- <i>trans</i> poly- <i>cis</i><br>prenol- 12<br>(Ibata et al., 1983) |
|-------------------------------------------------------------------------|------------------------------------|--------------------------------------------------------------------------|
|                                                                         | δ <sub>H</sub>                     | δ <sub>H</sub>                                                           |
| H-1                                                                     | 4.09, 2H d<br>( <i>J</i> = 7.2 Hz) | 4.09                                                                     |
| H-2                                                                     | 5.44, 1H t<br>( <i>J</i> = 7.2Hz)  | 5.44                                                                     |
| H-3                                                                     | 1.74, 3H s                         | 1.74                                                                     |
| H-4,5,8,9,12,13, 16,17,20,21,24,25,<br>28,29, 32,33,36,37,40,41,44,45   | 2.03, 44H m                        | 2.03, m*                                                                 |
| H-6,10,14,18,22,26,30,34,38,42,46                                       | 5.12, 11H br s                     | 5.12, br s                                                               |
| CH <sub>3</sub> -trans 35,39,43 and<br>ω- CH <sub>3</sub> - trans       | 1.60, 12H s                        | 1.60                                                                     |
| CH <sub>3</sub> -cis 7,11,15,19,23,27,31 and<br>ω- CH <sub>3</sub> -cis | 1.68, 24H s                        | 1.68                                                                     |

**Table S4. <sup>1</sup>H NMR Spectroscopic Data (400 MHz, CDCl<sub>3</sub>) for Compound 4.**

| Position | Compound 4                           | Stigmasterol (Pateh et al., 2009) |
|----------|--------------------------------------|-----------------------------------|
|          | $\delta_{\text{H}}$                  | $\delta_{\text{H}}$               |
| H-3      | 3.52, 1H m                           | 3.52, 1H m                        |
| H-6      | 5.35, 1H d ( $J = 4.2$ Hz)           | 5.36, 1H bs                       |
| H-18     | 0.70, 3H s                           | 0.70, 3H s                        |
| H-19     | 1.01, 3H s                           | 1.01, 3H s                        |
| H-21     | 1.02, 3H d ( $J = 7.6$ Hz)           | 1.02, 3H d ( $J = 7.5$ Hz)        |
| H-22     | 5.15, 1H dd<br>( $J = 15.1, 8.6$ Hz) | 5.14, 1H m                        |
| H-23     | 5.01, 1H dd<br>( $J = 15.1, 8.6$ Hz) | 4.98, 1H m                        |
| H-26     | 0.80, 3H d ( $J = 6.8$ Hz)           | 0.80, 3H d ( $J = 6.5$ Hz)        |
| H-27     | 0.85, 3H d ( $J = 6.1$ Hz)           | 0.85, 3H d ( $J = 6.5$ Hz)        |
| H-29     | 0.80, 3H t ( $J = 7.0$ Hz)           | 0.80, 3H t ( $J = 7.5$ Hz)        |

**Table S5.  $^1\text{H}$  NMR Spectroscopic Data (400 MHz,  $\text{CDCl}_3$ ) for Compound 5.**

| Position | Compound 5                 | $\beta$ -sitosterol (Pateh et al., 2009) |
|----------|----------------------------|------------------------------------------|
|          | $\delta_{\text{H}}$        | $\delta_{\text{H}}$                      |
| H-3      | 3.55, 1H m                 | 3.53, 1H m                               |
| H-6      | 5.37, 1H d ( $J = 4.8$ Hz) | 5.37, 1H bs                              |
| H-18     | 0.71, 3H s                 | 0.68, 3H s                               |
| H-19     | 1.07, 3H s                 | 1.01, 3H s                               |
| H-21     | 0.94, 3H d ( $J = 7.6$ Hz) | 0.92, 3H d ( $J = 7.5$ Hz)               |
| H-26     | 0.82, 3H d ( $J = 6.5$ Hz) | 0.81, 3H d ( $J = 6.5$ Hz)               |
| H-27     | 0.84, 3H d ( $J = 6.5$ Hz) | 0.83, 3H d ( $J = 6.5$ Hz)               |
| H-29     | 0.86, 3H t ( $J = 7.6$ Hz) | 0.85, 3H t ( $J = 7.5$ Hz)               |



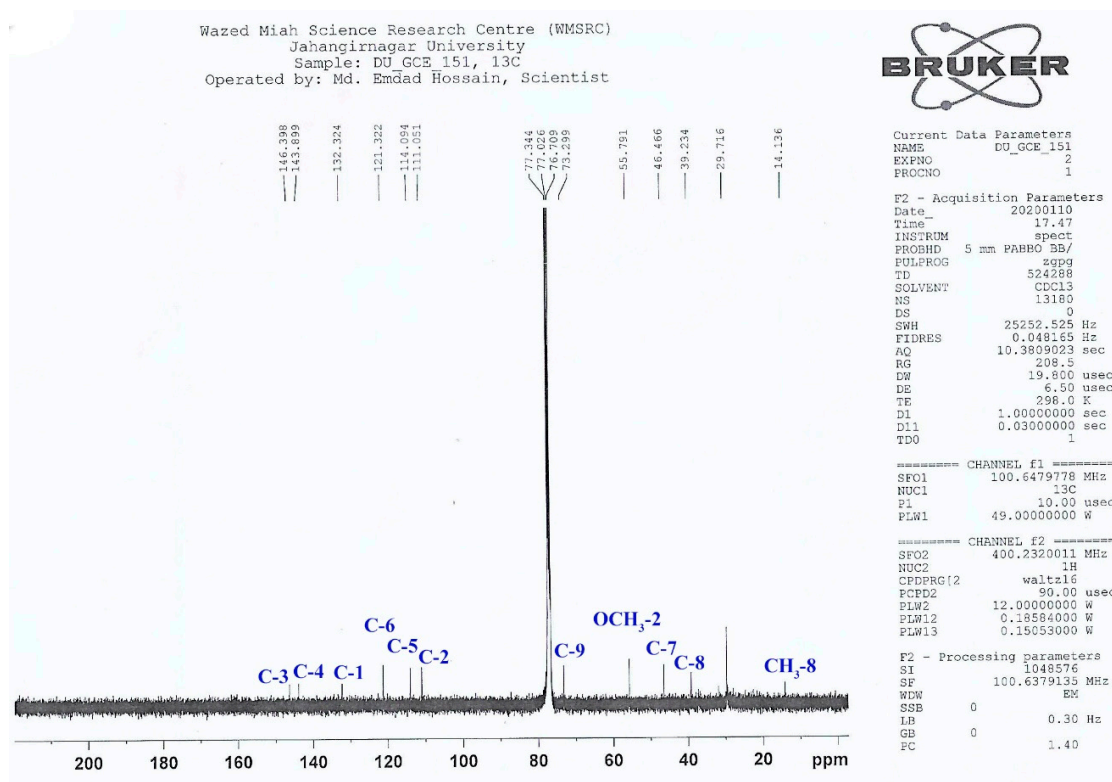

Figure S2.  $^{13}\text{C}$  NMR spectrum (400 MHz,  $\text{CDCl}_3$ ) of Compound 1.

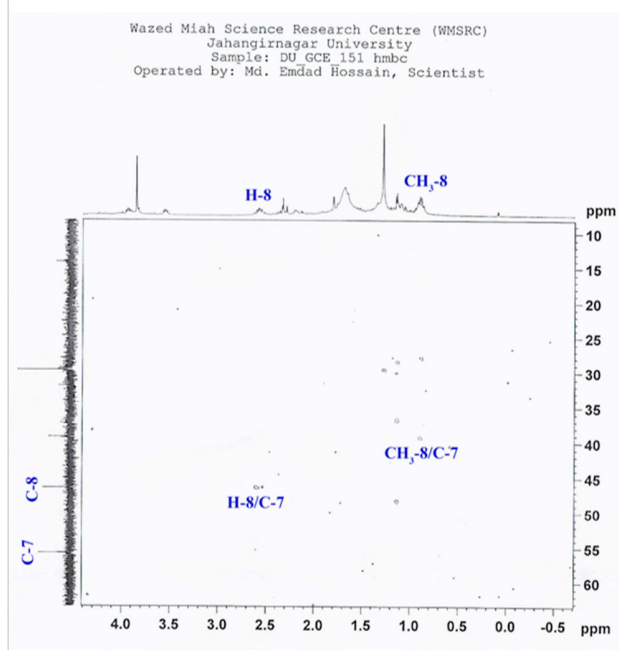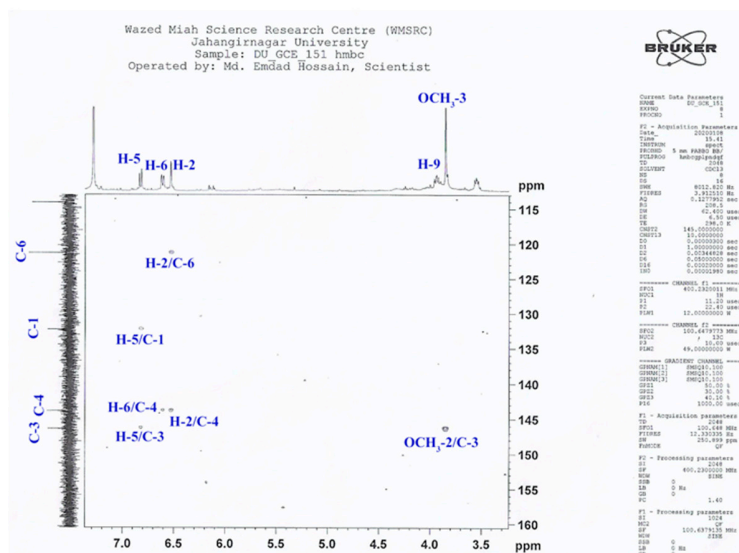

Figure S3. HMBC spectrum (400 MHz,  $\text{CDCl}_3$ ) of Compound 1.

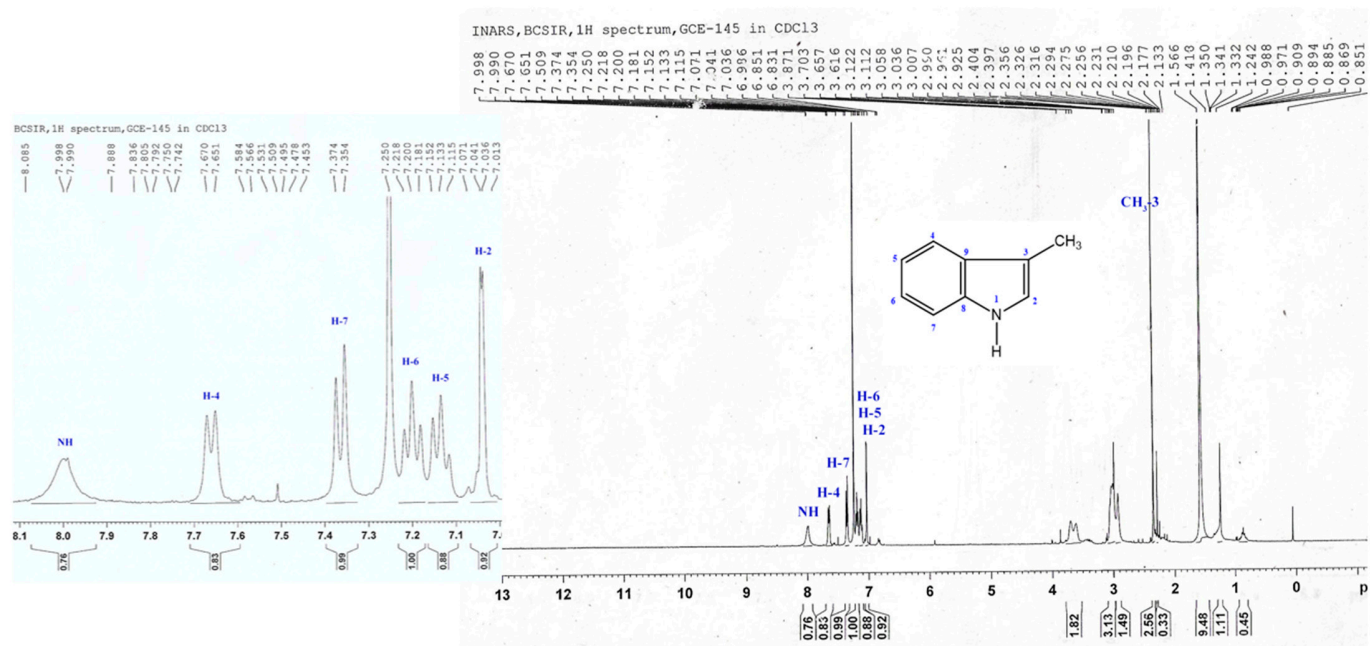

Figure S4.  $^1\text{H}$  NMR spectrum (400 MHz,  $\text{CDCl}_3$ ) of Compound 2.



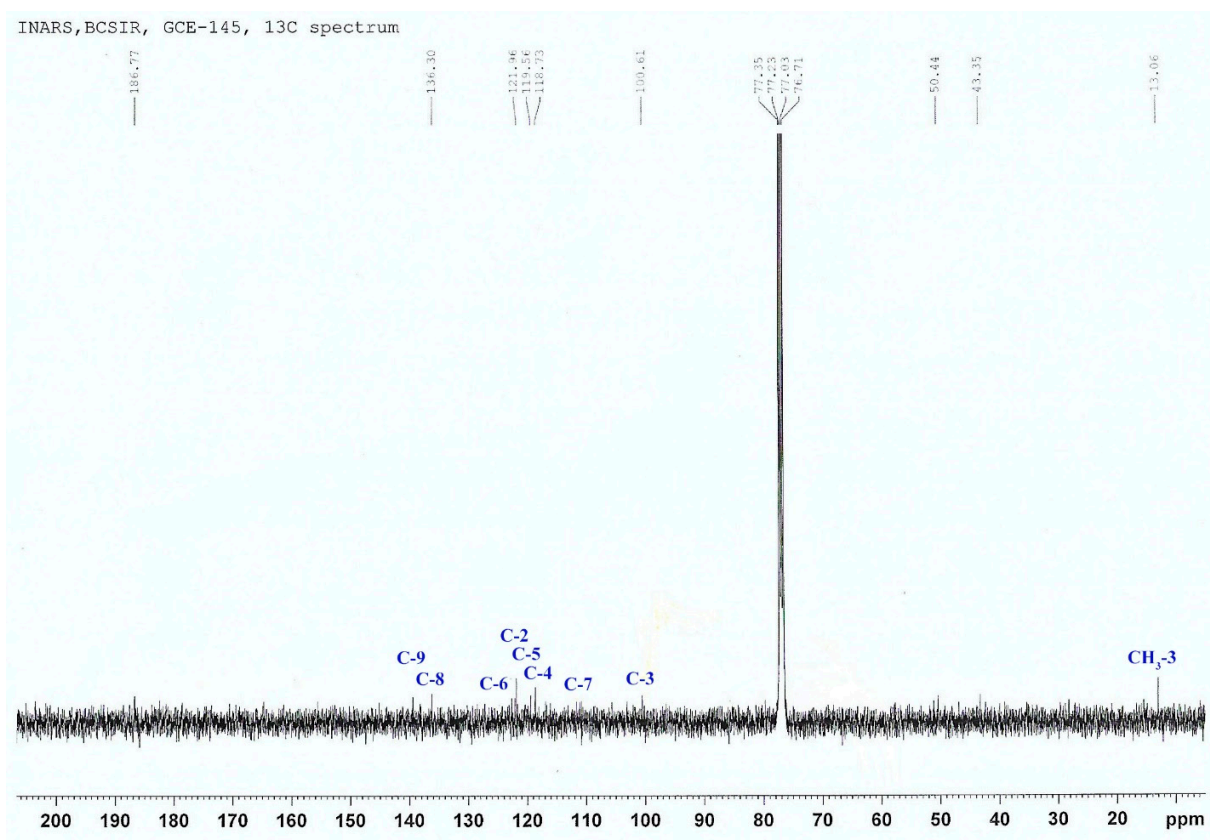

Figure S5.  $^{13}\text{C}$  NMR spectrum (400 MHz,  $\text{CDCl}_3$ ) of Compound 2.

INARS, BCSIR, Cosy 45, GCE-145

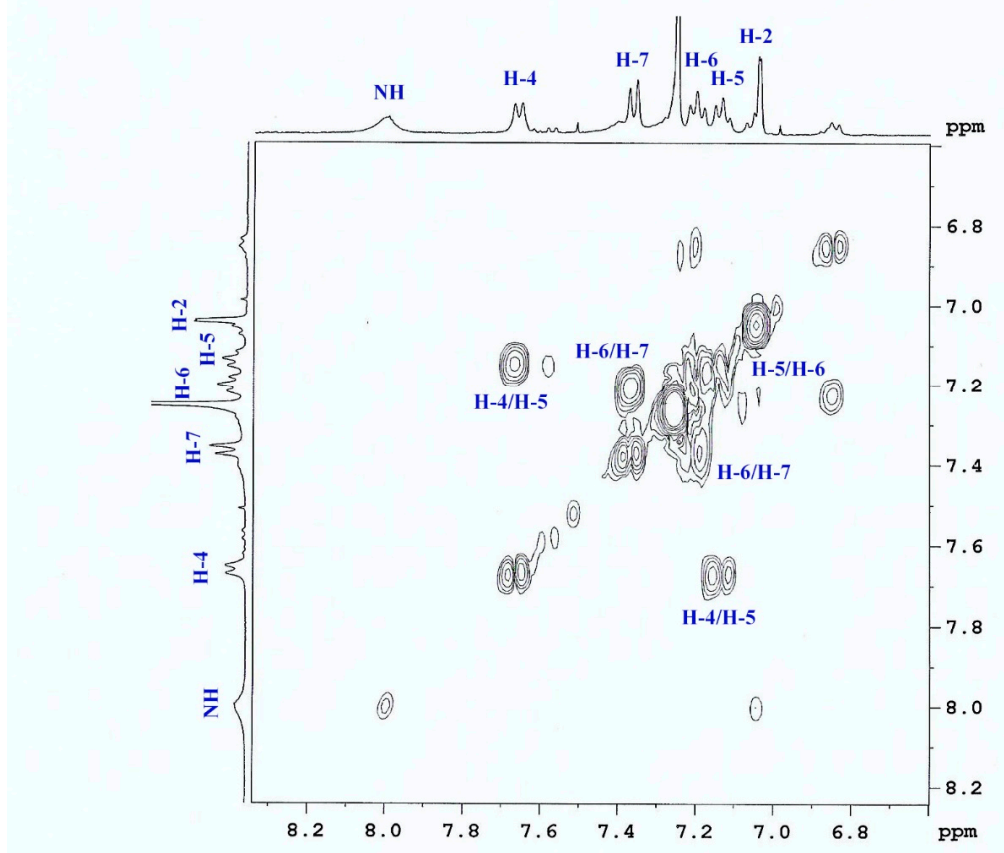

Figure S6. COSY spectrum (400 MHz, CDCl<sub>3</sub>) of Compound 2.

INARS, BCSIR, HSQC, GCE-145

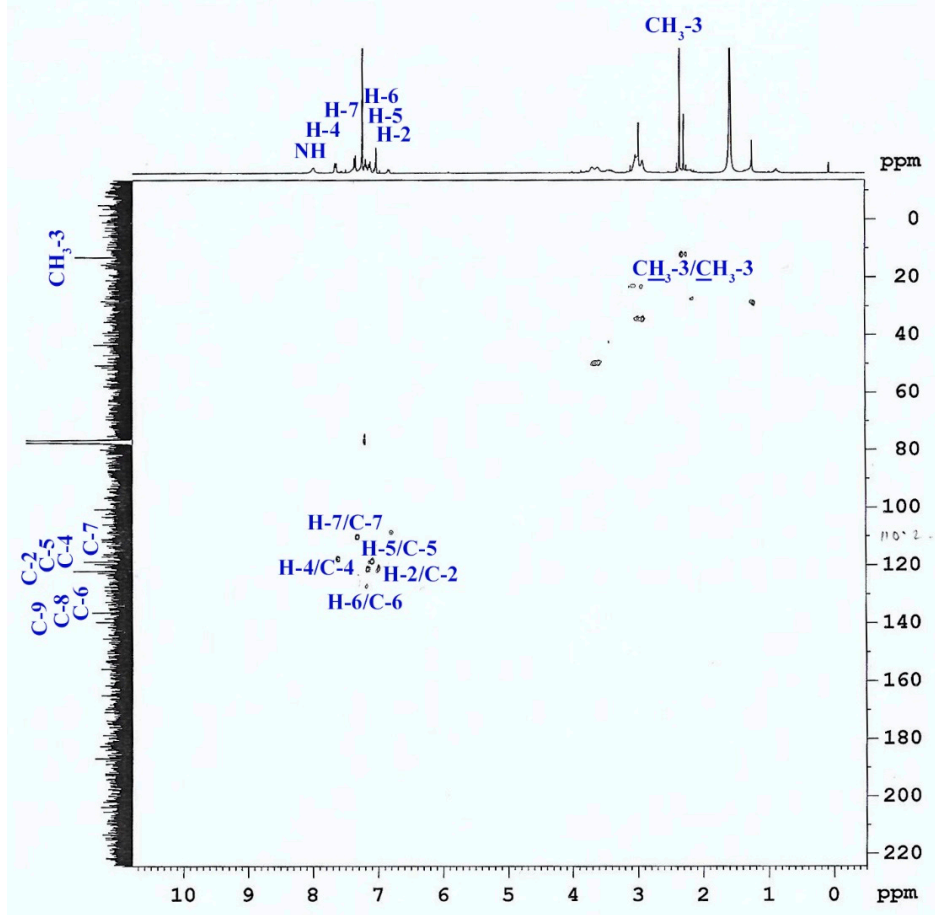

Figure S7. HSQC spectrum (400 MHz,  $\text{CDCl}_3$ ) of Compound 2.



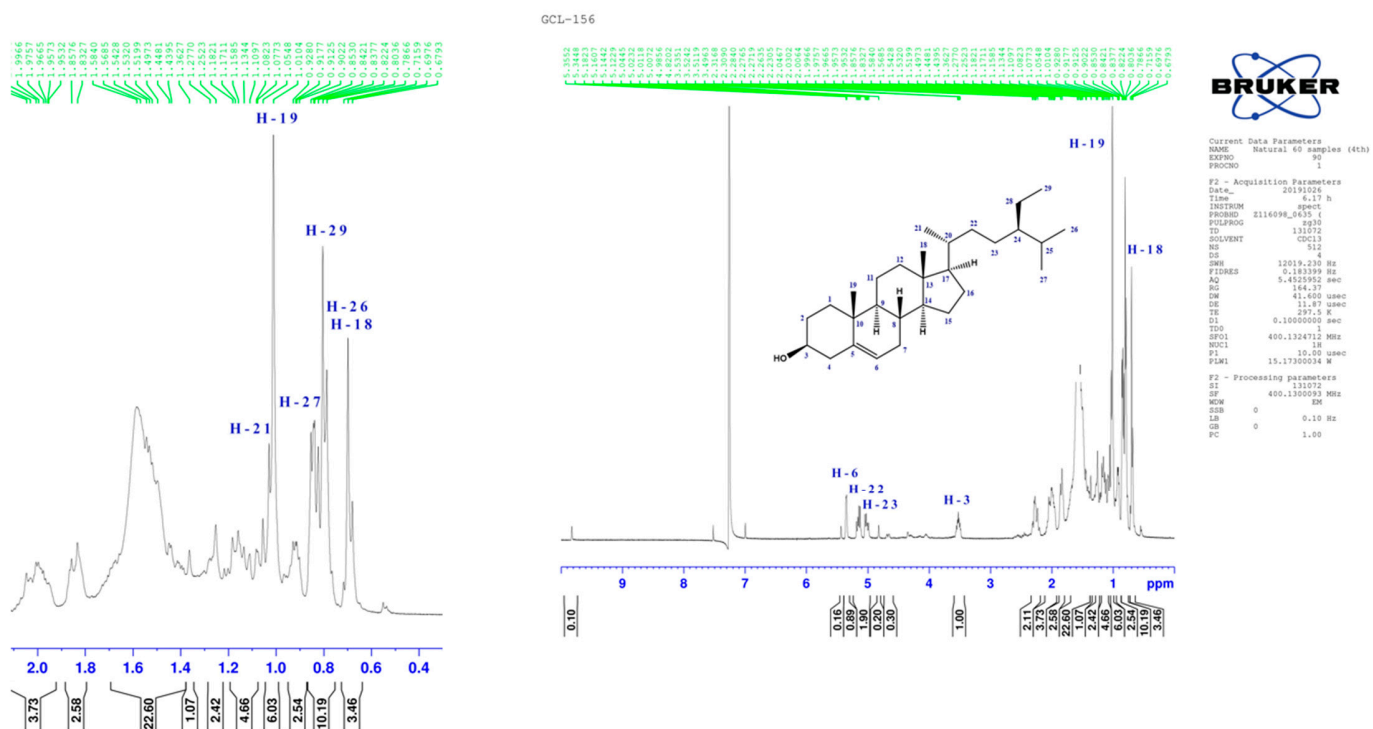

Figure S9.  $^1\text{H}$  NMR spectrum (400 MHz,  $\text{CDCl}_3$ ) of Compound 4.

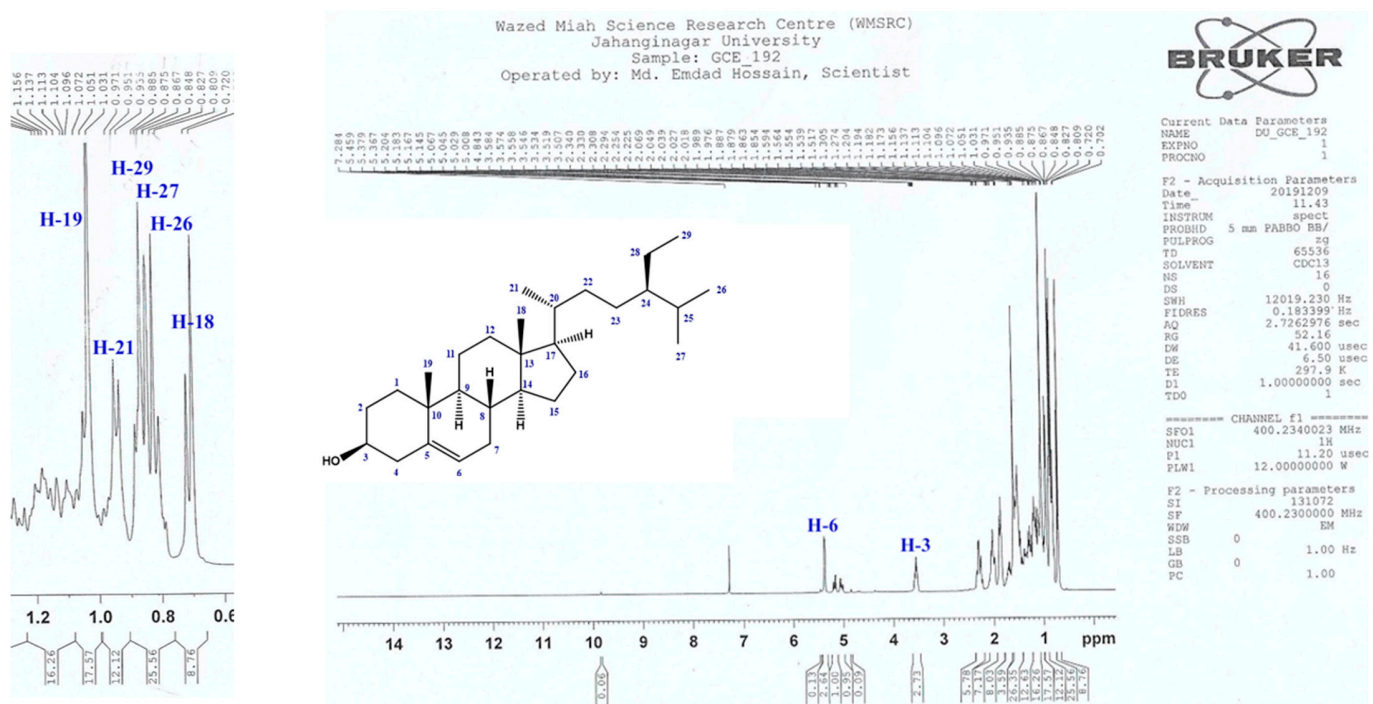

Figure S10.  $^1\text{H}$  NMR spectrum (400 MHz,  $\text{CDCl}_3$ ) of Compound 5.
